# Supplementary material for: Non-Metastatic Cutaneous Melanoma Induces Chronodisruption in Central and Peripheral Circadian Clocks
Source: PubMed Central journal article supplement (PMC5979525; doi:10.3390/ijms19041065), 2018-04-03
Supplement: ijms-19-01065-s001.pdf [file ijms-19-01065-s001.pdf]

# Non-Metastatic Cutaneous Melanoma Induces Chronodisruption in Central and Peripheral Circadian Clocks

**Leonardo Vinícius Monteiro de Assis**<sup>1,†</sup>, **Maria Nathália Moraes**<sup>1,†</sup>,  
**Keila Karoline Magalhães-Marques**<sup>1</sup>, **Gabriela Sarti Kinker**<sup>2</sup>,  
**Sanseray da Silveira Cruz-Machado**<sup>2</sup> and **Ana Maria de Lauro Castrucci**<sup>1,3,\*</sup>

<sup>1</sup> Laboratory of Comparative Physiology of Pigmentation, Department of Physiology, Institute of Biosciences, University of São Paulo, São Paulo, 05508-900, Brazil; deassis.leonardo@usp.br (L.V.M.d.A.); nathalia.moraes@usp.br (M.N.M.); keilamagalhaesmarques@gmail.com (K.K.M.-M.)

<sup>2</sup> Laboratory of Chronopharmacology, Department of Physiology, Institute of Biosciences, University of São Paulo, São Paulo, 05508-900, Brazil; gabriela.kinker@hotmail.com (G.S.K.); sanseray@hotmail.com (S.d.S.C.-M.)

<sup>3</sup> Department of Biology, University of Virginia, Charlottesville, VA, 22904, USA

\* Correspondence: amdllcast@ib.usp.br; Tel.: +55 11 3091 7523

† These authors contributed equally to this work.

## Suprachiasmatic Nucleus Removal

Posterior Hypothalamus

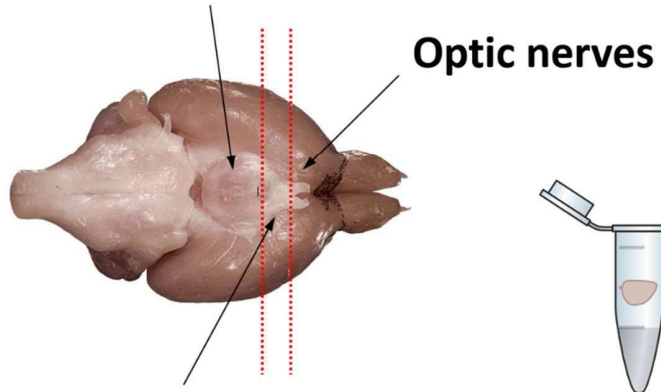

Anterior Hypothalamus

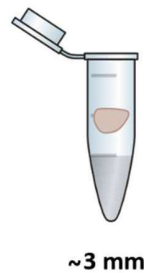

~3 mm

TRIZOL RNA extraction

↓  
*Vip*-positive mRNA expression

Figure S1. Schematic ventral view of mouse brain. Dashed red lines delineate the area excised from the anterior hypothalamus and that corresponds to the suprachiasmatic nuclei.

Supplementary Table S1 – Clinicopathological characteristics of human normal skin and primary melanoma

|            |             | GTEX<br>Normal Skinn =<br>557 (%) | TCGA Primary<br>Melanoma<br>n = 102 (%) |
|------------|-------------|-----------------------------------|-----------------------------------------|
| Gender     | Male        | 365 (66)                          | 35 (34)                                 |
|            | Female      | 192 (34)                          | 67 (66)                                 |
| Age        | < 60        | 374 (67)                          | 34 (33)                                 |
|            | ≥ 60        | 183 (33)                          | 68 (67)                                 |
| Location   | Head/neck   | 0 (0)                             | 8 (8)                                   |
|            | Trunk       | 232 (42)                          | 47 (46)                                 |
|            | Extremities | 325 (58)                          | 41 (40)                                 |
| Skin color | Other       | 0 (0)                             | 6 (6)                                   |
|            | Fair        | NA                                | 102 (100)                               |
|            | Medium/dark | NA                                | 0 (0)                                   |
